# Supplementary material for: Optimized Flow Cytometric Detection of Transient Receptor Potential Vanilloid-1 (TRPV1) in Human Hematological Malignancies
Source: bioRxiv or medRxiv preprint supplement (doi:10.1101/2021.08.04.21261521), 2021-08-08

Supplementary Fig. 1: overview of the step by step Flow cytometry protocol for the detection of TRPV1 in human leukocytes in peripheral blood

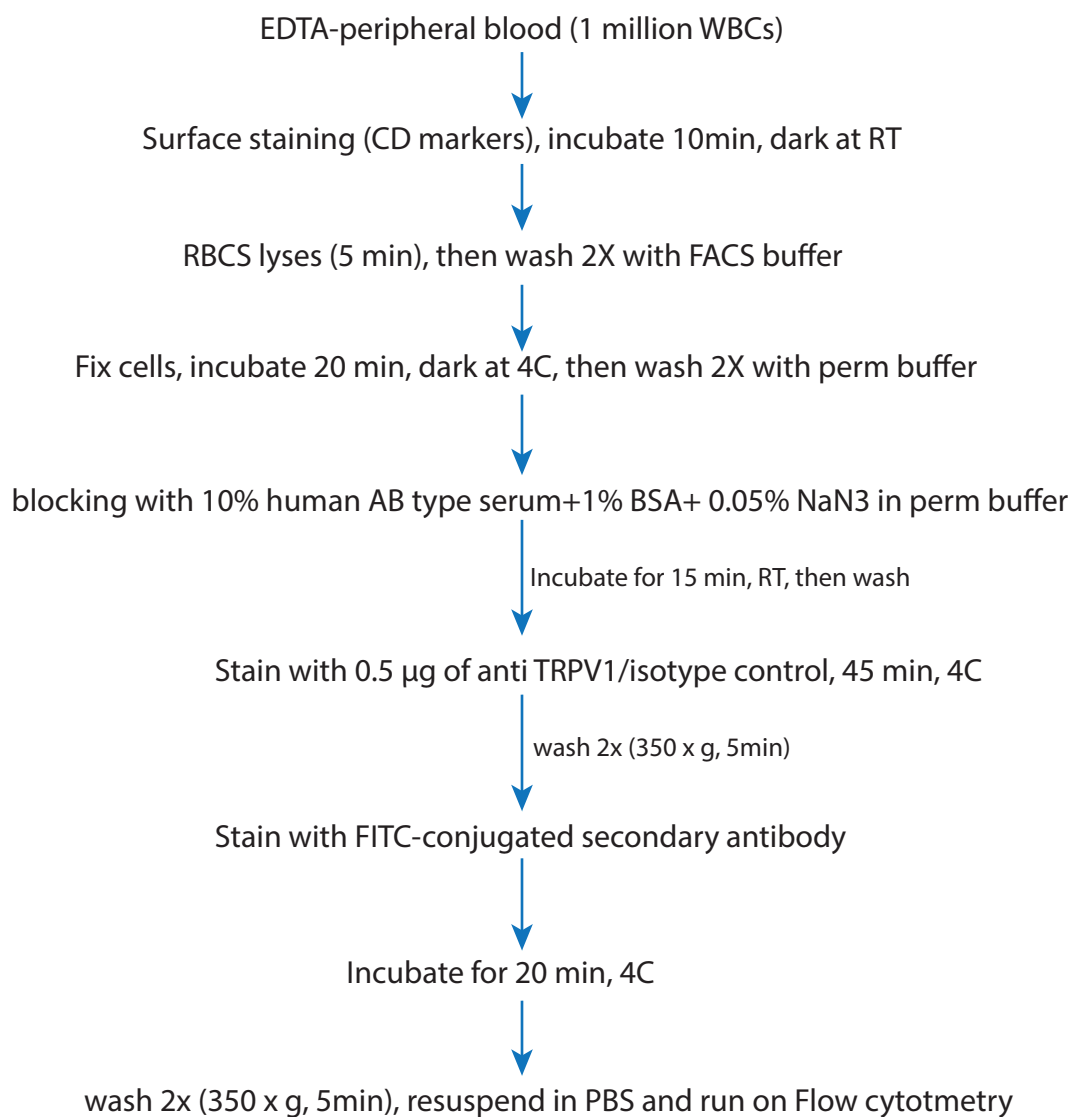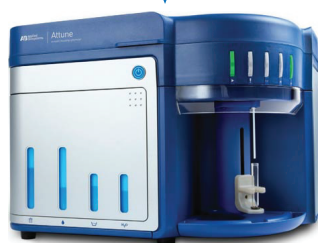

Supplement: Supplementary file [file media-1.pdf]
